# Supplementary material for: Genetic engineering of human NK cells to express CXCR2 improves migration to renal cell carcinoma
Source: PubMed Central journal article supplement (PMC5604543; doi:10.1186/s40425-017-0275-9), 2017-09-19
Supplement: 40425_2017_275_MOESM1_ESM.pdf [file 40425_2017_275_MOESM1_ESM.pdf]

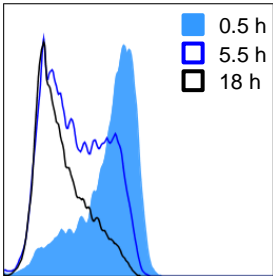

CXCR2
